# Supplementary material for: tDCS to premotor cortex changes action verb understanding: Complementary effects of inhibitory and excitatory stimulation
Source: PubMed Central journal article supplement (PMC6065381; doi:10.1038/s41598-018-29600-6), 2018-07-30
Supplement: 41598_2018_29600_MOESM1_ESM.pdf [file 41598_2018_29600_MOESM1_ESM.pdf]

## Supplementary Materials.

### tDCS to premotor cortex changes action verb understanding: Complementary effects of inhibitory and excitatory stimulation

Tom Gijssels<sup>1,2</sup>, Richard B. Ivry<sup>3</sup>, and Daniel Casasanto<sup>1</sup>

**Supplementary Figure 1. Reaction Time results**

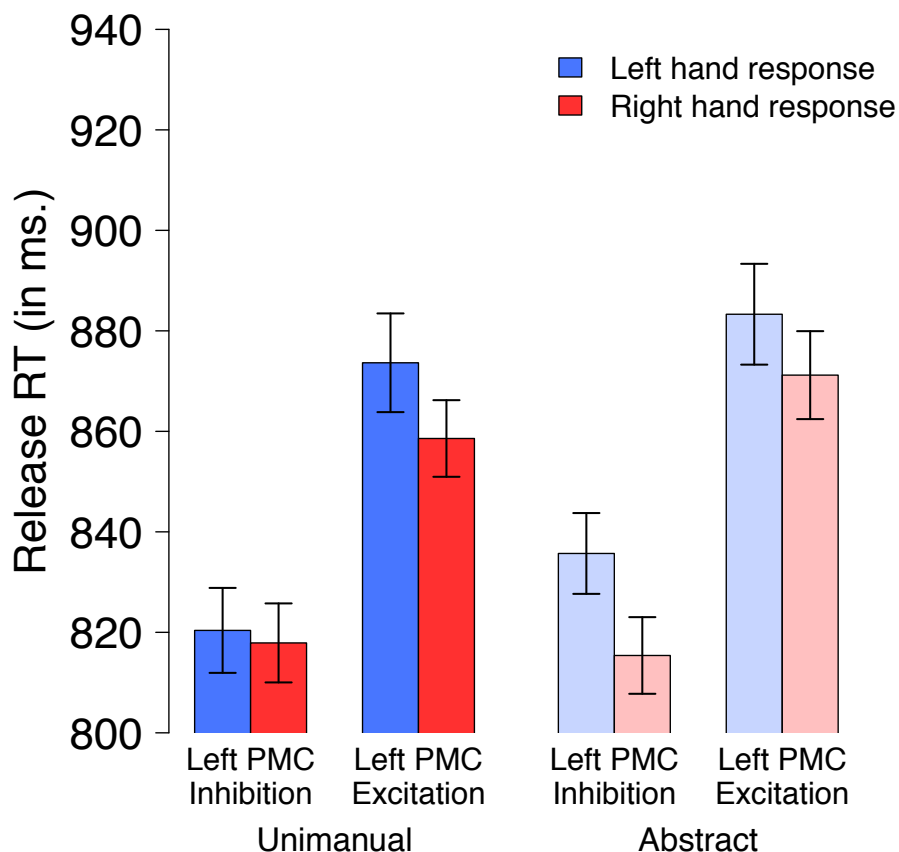

**Supplementary Figure 1.** Mean release reaction time on the lexical decision task for all items. Left PMC Inhibition = cathode left PMC, anode right PMC; Left PMC Excitation = anode left PMC, cathode right PMC. Unimanual and Abstract refer to the Verb type of the stimuli.

**Supplementary Table 1.** Full model: High- and low-error items combined

|                                | Estimate | SE   | z-value    | p    |
|--------------------------------|----------|------|------------|------|
| Intercept                      | -3.13    | .001 | -5,948.231 | <0   |
| Anode Position                 | -.105    | .157 | .157       | .504 |
| Verb Type                      | -.204    | .14  | -1.461     | .144 |
| Resp. Hand                     | .073     | .131 | .556       | .578 |
| Anode Position<br>x Verb Type  | .26      | .205 | 1.269      | .205 |
| Anode Position<br>x Resp. Hand | -.003    | .153 | -.018      | .986 |

|                                         |       |      |        |      |
|-----------------------------------------|-------|------|--------|------|
| Verb Type x Resp. Hand                  | -.163 | .211 | .771   | .44  |
| Anode Position x Verb Type x Resp. Hand | -.818 | .396 | -2.065 | .039 |

**Supplementary Table 2.** Submodel for unimanual verbs: High- and low-error items combined

|                             | Estimate | SE   | z-value | p    |
|-----------------------------|----------|------|---------|------|
| Intercept                   | -3.195   | .127 | -25.188 | 0    |
| Anode Position              | .07      | .213 | .327    | .743 |
| Resp. Hand                  | -.029    | .191 | -.15    | .881 |
| Anode Position x Resp. Hand | -.317    | .323 | .983    | .326 |

**Supplementary Table 3.** Submodel for abstract verbs: High- and low-error items combined

|                             | Estimate | SE   | z-value | p    |
|-----------------------------|----------|------|---------|------|
| Intercept                   | -3.018   | .085 | -35.444 | 0    |
| Anode Position              | -.266    | .182 | -1.466  | .143 |
| Resp. Hand                  | .173     | .179 | .965    | .334 |
| Anode Position x Resp. Hand | .333     | .314 | 1.06    | .289 |

**Supplementary Table 4.** Full model: High-error items only

|                                         | Estimate | SE   | z-value | p    |
|-----------------------------------------|----------|------|---------|------|
| Intercept                               | -2.636   | .099 | -26.592 | 0    |
| Anode Position                          | -.049    | .18  | -.272   | .789 |
| Verb Type                               | -.165    | .151 | -1.095  | .274 |
| Resp. Hand                              | .136     | .148 | .915    | .36  |
| Anode Position x Verb Type              | .354     | .248 | 1.427   | .154 |
| Anode Position x Resp. Hand             | -.34     | .252 | -1.35   | .177 |
| Verb Type x Resp. Hand                  | -.096    | .278 | -.344   | .731 |
| Anode Position x Verb Type x Resp. Hand | -1.07    | .466 | -2.293  | .022 |

**Supplementary Table 5.** Submodel for unimanual verbs: High-error items only

|                | Estimate | SE   | z-value | p    |
|----------------|----------|------|---------|------|
| Intercept      | -2.659   | .124 | -21.436 | 0    |
| Anode Position | .122     | .229 | .535    | .593 |
| Resp. Hand     | .038     | .215 | .178    | .859 |

|                                |       |      |        |     |
|--------------------------------|-------|------|--------|-----|
| Anode Position<br>x Resp. Hand | -.804 | .347 | -2.319 | .02 |
|--------------------------------|-------|------|--------|-----|

**Supplementary Table 6.** Submodel for unimanual verbs, left cathode: High-error items only

|            | Estimate | SE   | z-value | p    |
|------------|----------|------|---------|------|
| Intercept  | -2.59    | .165 | -15.688 | 0    |
| Resp. Hand | -.412    | .261 | -1.581  | .114 |

**Supplementary Table 7.** Submodel for unimanual verbs, left anode: High-error items only

|            | Estimate | SE   | z-value | p    |
|------------|----------|------|---------|------|
| Intercept  | -2.806   | .211 | -13.277 | 0    |
| Resp. Hand | .616     | .369 | 1.667   | .095 |

**Supplementary Table 8.** Submodel for abstract verbs: High-error items only

|                                | Estimate | SE   | z-value | p    |
|--------------------------------|----------|------|---------|------|
| Intercept                      | -2.589   | .126 | -20.550 | 0    |
| Anode Position                 | -.281    | .215 | -1.306  | .192 |
| Resp. Hand                     | .229     | .211 | 1.082   | .279 |
| Anode Position<br>x Resp. Hand | .203     | .362 | .561    | .575 |

**Supplementary Table 9.** Full model: Low error items only

|                                               | Estimate | SE   | z-value | p    |
|-----------------------------------------------|----------|------|---------|------|
| Intercept                                     | -3.865   | .162 | -23.92  | 0    |
| Anode Position                                | -.09     | .258 | -.35    | .726 |
| Verb Type                                     | -.216    | .269 | -.803   | .422 |
| Resp. Hand                                    | -.171    | .31  | -.55    | .583 |
| Anode Position<br>x Verb Type                 | .083     | .429 | .194    | .846 |
| Anode Position<br>x Resp. Hand                | .115     | .49  | .234    | .815 |
| Verb Type x<br>Resp. Hand                     | .156     | .523 | .299    | .765 |
| Anode Position<br>x Verb Type x<br>Resp. Hand | -.192    | .737 | -.261   | .794 |
